# Supplementary material
Source: PubMed Central journal article supplement (PMC2820420)
Supplement: E09-06-0505_1.pdf [file E09-06-0505_1.pdf]

## Supplementary Information

### *PLK4 consensus phosphorylation motif*

A consensus sequence obtained by the peptide library screen is consistent with the PLK4 phosphorylation site and is represented here as a one letter code:

$\Lambda/\Psi/B(M/S) - X - [(L)] - S/T - \Lambda[E] - \Phi/\Lambda(L) - X$  where  $\Phi$  (Phi),  $\Psi$  (Psi),  $\Lambda$  (Lambda), B and E (Epsilon) represent aromatic, hydrophobic, aliphatic, basic and charged residues, respectively. In brackets are unfavoured residue functions and in parentheses, information on the steric nature of residues is mentioned; where S, M and L denote small, medium and large residues, respectively. X corresponds to any residue. As a reference, the consensus phosphorylation motif contains the phosphorylated serine (S) or threonine (T) at position 0 (depicted S/T). Medium to small aliphatic or basic residues are found at position -3 such as Ile, Pro, Val, Met, Gly, Arg and Lys. Large residues are unfavoured at position -1 such as His, Phe, Tyr and Trp. The *in-vitro* screen analysis suggests that residues at positions +1 and +2 correspond mainly to aliphatic residues, moreover large aromatic residues are mainly allowed at position +2. Interestingly, those residues found at positions +1 and +2 are mainly turn breakers and helical formers. The autophosphorylation PLK4 sequence Ser-Ile-Ser-Gly-Ser-Leu-Phe-Asp-Lys-Arg-Arg-Leu-Leu is in agreement with the optimal consensus sequence where Ile-Ser-Gly-Ser-Leu-Phe corresponds to positions -3 -2 -1 0 +1 +2 respectively and therefore the second Ser is the residue phosphorylated by the kinase.

**Supplementary Table 1: List of peptides screened in array**

| peptide number | Biotin-Ttds-----<br>Glycinamide | derived from:            | site          | mutation                |
|----------------|---------------------------------|--------------------------|---------------|-------------------------|
| 1              | GQRDSSYYWEIE                    | c-Raf (positive control) |               |                         |
| 2              | GQRDSAYYWEIE                    | c-Raf S339A              |               |                         |
| 3              | GQRDASYWEIE                     | c-Raf S338A              |               |                         |
| 4              | NLLGKGSFAGVYR                   | PLK4 kin domain          | Ser22         |                         |
| 5              | QLKHPSILELYNY                   | PLK4 kin domain          | Ser71         |                         |
| 6              | LYNYFEDSNYVYL                   | PLK4 kin domain          | Ser82         |                         |
| 7              | ILHRDLTNSNLLL                   | PLK4 kin domain          | Thr138 Ser140 |                         |
| 8              | ILHRDLALSNNLL                   | PLK4 kin domain          | Thr138 Ser140 | T138A                   |
| 9              | ILHRDLTLANLLL                   | PLK4 kin domain          | Thr138 Ser140 | S140A                   |
| 10             | SAHGLESDVWVSLG                  | PLK4 kin domain          | Ser192        |                         |
| 11             | DYEMPSFLSIEAK                   | PLK4 kin domain          | Ser232 Ser235 |                         |
| 12             | DYEMPAFLSIEAK                   | PLK4 kin domain          | Ser232 Ser235 | S232A                   |
| 13             | DYEMPSFLAIEAK                   | PLK4 kin domain          | Ser232 Ser235 | S235A                   |
| 14             | DYEMPTFLSIEAK                   | PLK4 kin domain          | Ser232 Ser235 | S235T<br>(polymorphism) |
| 15             | LRRNPADRLSLSS                   | PLK4 kin domain          | Ser255        |                         |
| 16             | LRRNPADRLALSS                   | PLK4 kin domain          | Ser255        | S255A                   |
| 17             | DRLSLSSVLDHPF                   | PLK4 kin domain          | Ser257-258    |                         |
| 18             | DRLSLASVLDHPF                   | PLK4 kin domain          | Ser257-258    | S257A                   |
| 19             | DRLSLSAVLDHPF                   | PLK4 kin domain          | Ser257-258    | S258A                   |
| 20             | SISGSLFDKRLL                    | PEST sequence 1          | Ser303 Ser305 |                         |
| 21             | SISGALFDKRLL                    | PEST sequence 1          | Ser303 Ser305 | S305A                   |
| 22             | SIAGSLFDKRLL                    | PEST sequence 1          | Ser303 Ser305 | S303A                   |
| 23             | PLPNKMTVFPKNK                   | after destruction box    | Thr323        |                         |
| 24             | DGNSFYTQWGNQ                    | Linker region            | Ser342 T345   |                         |

|    |                                                             |                 |             |           |
|----|-------------------------------------------------------------|-----------------|-------------|-----------|
| 25 | DGN <b>A</b> F <b>Y</b> TQWGNQ                              | Linker region   | Ser342 T345 | S342A     |
| 26 | DGN <b>S</b> F <b>A</b> QWGNQ                               | Linker region   | Ser342 T345 | T345A     |
| 27 | NEERY <b>S</b> P <b>T</b> DNNAN                             | Linker region   | Ser421      |           |
| 28 | NEERY <b>A</b> P <b>T</b> DNNAN                             | Linker region   | Ser421      | S421A     |
| 29 | <b>S</b> S <b>S</b> G <b>S</b> FERPDNNQ                     | Linker region   | Ser443      |           |
| 30 | <b>S</b> S <b>S</b> G <b>A</b> FERPDNNQ                     | Linker region   | Ser443      | S443A     |
| 31 | <b>A</b> A <b>A</b> G <b>S</b> FERPDNNQ                     | Linker region   | Ser443      | S439-441A |
| 32 | EYD <b>S</b> I <b>S</b> PNRDFQG                             | Linker region   | Ser497      |           |
| 33 | EYD <b>A</b> I <b>S</b> PNRDFQG                             | Linker region   | Ser497      |           |
| 34 | EYD <b>S</b> I <b>A</b> PNRDFQG                             | Linker region   | Ser497      |           |
| 35 | <b>S</b> DG <b>N</b> T <b>I</b> I <b>I</b> YYPNG            | Crypto-Polo Box | Thr 645 647 |           |
| 36 | <b>S</b> DG <b>N</b> A <b>I</b> I <b>I</b> YYPNG            | Crypto-Polo Box | Thr 645 647 | T645A     |
| 37 | <b>S</b> DG <b>N</b> T <b>I</b> A <b>I</b> YYPNG            | Crypto-Polo Box | Thr 645 647 | T647A     |
| 38 | DN <b>I</b> S <b>R</b> Y <b>S</b> FDNLPE                    | Crypto-Polo Box | Ser674      |           |
| 39 | DN <b>I</b> S <b>R</b> Y <b>A</b> FDNLPE                    | Crypto-Polo Box | Ser674      | S674A     |
| 40 | DN <b>I</b> A <b>R</b> Y <b>S</b> FDNLPE                    | Crypto-Polo Box | Ser674      | S671A     |
| 41 | <b>K</b> SP <b>K</b> I <b>T</b> Y <b>F</b> TRYAK            | Crypto-Polo Box | Thr 704 707 |           |
| 42 | <b>K</b> SP <b>K</b> I <b>A</b> Y <b>F</b> TRYAK            | Crypto-Polo Box | Thr 704 707 | T704A     |
| 43 | <b>K</b> SP <b>K</b> I <b>T</b> Y <b>F</b> A <b>R</b> YAK   | Crypto-Polo Box | Thr 704 707 | T707A     |
| 44 | KI <b>H</b> K <b>T</b> EDFIQVIE                             | Crypto-Polo Box | Thr736      |           |
| 45 | QVIE <b>K</b> T <b>G</b> K <b>S</b> YTLK                    | Crypto-Polo Box | Ser749      |           |
| 46 | QVIE <b>K</b> A <b>G</b> K <b>S</b> YTLK                    | Crypto-Polo Box | Ser749      | T746A     |
| 47 | QVIE <b>K</b> T <b>G</b> K <b>A</b> YTLK                    | Crypto-Polo Box | Ser749      | S749A     |
| 48 | QVIE <b>K</b> T <b>G</b> K <b>S</b> YALK                    | Crypto-Polo Box | Ser749      | T751A     |
| 49 | PP <b>S</b> V <b>D</b> S <b>N</b> Y <b>P</b> T <b>R</b> RDR | Crypto-Polo Box | Ser824      |           |
| 50 | PP <b>S</b> V <b>D</b> A <b>N</b> Y <b>P</b> T <b>R</b> RDR | Crypto-Polo Box | Ser824      | S824A     |
| 51 | PP <b>S</b> V <b>D</b> S <b>N</b> Y <b>P</b> A <b>R</b> RDR | Crypto-Polo Box | Ser824      | T828A     |
| 52 | RDR <b>A</b> S <b>F</b> N <b>R</b> M <b>V</b> M <b>H</b>    | Crypto-Polo Box | Ser833      |           |

|    |               |                          |               |             |
|----|---------------|--------------------------|---------------|-------------|
| 53 | GTDISSNSLKDC  | Crypto-Polo Box          | Ser873 874    |             |
| 54 | GTDIASNSLKDC  | Crypto-Polo Box          | Ser873 874    | S873A       |
| 55 | GTDISANSLKDC  | Crypto-Polo Box          | Ser873 874    | S874A       |
| 56 | GTDISANALKDC  | Crypto-Polo Box          | Ser873 874    | S874A S876A |
| 57 | AQLLKSVFVKNVG | PEST sequence 3          | Ser890        |             |
| 58 | VGWATQLTSGAVW | PEST seq 3 + Polo Box    | Thr899 Ser904 |             |
| 59 | VGWAAQLTSGAVW | PEST seq 3 + Polo Box    | Thr899 Ser904 | T899A       |
| 60 | VGWATQLASGAVW | PEST seq 3 + Polo Box    | Thr899 Ser904 | T903A       |
| 61 | VGWATQLTAGAVW | PEST seq 3 + Polo Box    | Thr899 Ser904 | S904A       |
| 62 | VQFNDGSQLVVQA | PEST seq 3 + Polo Box    | Ser915        |             |
| 63 | GVSSISYTPNGQ  | Polo Box                 | Ser927        |             |
| 64 | GVSSIA YTPNGQ | Polo Box                 | Ser927        | S927A       |
| 65 | GVASISYTPNGQ  | Polo Box                 | Ser927        | S924A       |
| 66 | GVSAISYTPNGQ  | Polo Box                 | Ser927        | S925A       |
| 67 | QKLQCLSSILLMF | Polo Box                 | Ser956-Ser957 |             |
| 68 | QKLQCLASILLMF | Polo Box                 | Ser956-Ser957 | S956A       |
| 69 | QKLQCLSAILLMF | Polo Box                 | Ser956-Ser957 | S957A       |
| +  | GQRDSSYYWEIE  | c-Raf (positive control) | Raf duplo     |             |
| 71 | RGQRDSSYYWE   | c-Raf (positive control) | shorter       |             |
| 72 | RGQRDASYWE    | c-Raf S339A              | shorter       |             |
| 73 | RGQRDSAYWE    | c-Raf S338A              | shorter       |             |

### **Supplementary Figure S1. Specificity of anti-PLK4 polyclonal antibodies**

(A) Western blotting detection of endogenous PLK4 from KE37 purified centrosomes using antibodies raised against the kinase and crypto Polo-box domains of PLK4. Both of the antibodies predominantly recognized a protein migrating at 107 kD, which corresponded well with the predicted molecular of PLK4 of 109 kD. (B) RPE1 cells transiently transfected with an EGFP-PLK4 expression construct were fixed and stained with the KD and CPB antibodies. The labelling obtained with the KD and CPB antibodies co-localizes with the overexpressed PLK4 demonstrating that the antibodies recognize their target antigen. (C) HeLa GFP-centrin-1 (green) cells were treated with siRNA against PLK4 or lamin A/C, as a control, for 48 hours and stained with DAPI (blue) to label DNA and PLK4 KD antibody (red). The lamin A/C control siRNA-treated cell has a duplicating centrosome (two centrioles and two procentrioles) and robust PLK4 staining. Two images of PLK4 siRNA-treated cells are shown with diminished PLK KD antibody staining and a single focus of GFP-centrin 1 labelling, suggesting that only a single centriole is present. These data indicate that PLK4 has been successfully depleted as only one centriole was present in each cell and that the PLK4 KD antibody is specific. Scale bar 10  $\mu\text{m}$ ; inset 1  $\mu\text{m}$ .

### **Supplementary Figure S2. PLK4 pS305 antibody specifically recognizes S305 phosphorylated PLK4**

(A) Western blotting of KE37 purified centrosomes with the PLK4 pS305 antibody in the presence or absence of competing non-phosphorylated and phosphorylated peptides corresponding to the sequence used for immunization. A reduction in signal was observed upon incubation of the PLK4 pS305 antibody with the phosphorylated competing peptide, but not with the non-phosphorylated peptide. (B) RPE1 cells were transfected with EGFP alone, EGFP-PLK4, -PLK4 K41M, and -PLK4 S305A and treated with 5  $\mu\text{M}$  MG115 for 16 hours to induce the accumulation of S305 phosphorylated PLK4. Western blotting was carried out on whole cell lysates using the PLK4 KD and PLK4 pS305 antibodies.

The PLK4 KD antibody showed that over-expressed EGFP-PLK4 was present in the appropriate samples. Western blotting with the PLK4 pS305 antibody showed that it recognized only the active kinase and no detectable signal was present in the PLK4 K41M and PLK4 S305A mutant samples. (C) Images of mitotic cells after PLK4 or lamin A/C RNAi. HeLa GFP-centrin-1 (green) cells were treated with siRNA against PLK4 or lamin A/C for 48 hours and stained with DAPI (blue) to label DNA and PLK4 pS305 (red) antibody. Scale bar 10  $\mu\text{m}$ ; inset 1  $\mu\text{m}$ . The mitotic PLK4-depleted cell has a single centriole that is labelled extremely weakly by the PLK4 pS305 antibody. Together these data demonstrate that the PLK4 pS305 antibody specifically recognizes S305 phosphorylated PLK4.

**Supplementary Figure S3. Inhibition of proteasome results in the accumulation of S305 phosphorylated PLK4.**

(A) RPE1 cells were transfected with wild-type EGFP-PLK4 and then treated 6 hours later with the proteasome inhibitors MG115 (5  $\mu\text{M}$ ), MG132 (1  $\mu\text{M}$ ) or AdaAhx<sub>3</sub>L<sub>3</sub>VS (1  $\mu\text{M}$ ) for a total of 16 hours. Western blotting of transfected cell lysates was carried out using the PLK4 KD and PLK4 pS305 antibodies and shows that all of the proteasome inhibitors promoted the accumulation of S305 phosphorylated PLK4. The inhibitor AdaAhx<sub>3</sub>L<sub>3</sub>VS caused an increase in the total amount of EGFP-PLK4 as well.

**Supplementary Figure S4. PLK4 S305 mutants are catalytically active**

(A) PC3 cells were transfected with EGFP-PLK4-3xFLAG expression constructs, treated 24 hours later with 1  $\mu\text{M}$  MG115 for 3 hours and the exogenously expressed PLK4 immunoprecipitated using an anti-FLAG antibody. Eighty percent of the immunoprecipitated material was used to carry out an *in vitro* kinase assay (upper panel), while the remainder was subjected to western blotting with the PLK4 KD antibody (lower panel). The results show that both PLK4 S305A and PLK4 S305E mutants are catalytically active, whereas PLK4 K41M and PLK4 K41M ND are not.

**Supplementary Figure S5. PLK4 S305 autophosphorylation enhances centriole amplification in RPE1 cells.**

(A) Images of RPE1 cells transfected with EGFP-PLK4 constructs (green), fixed and stained with DAPI (blue) to label DNA and anti-HsSAS-6 antibody (red). All of the catalytically active forms of PLK4 were able to trigger centriole amplification albeit to varying efficiencies. Scale bar 10  $\mu\text{m}$ ; inset 1  $\mu\text{m}$ .

(B) Quantification of EGFP-PLK4 transfected cells possessing supernumerary centrioles. The results represent four independent experiments counting 300 transfected cells in each group.

A

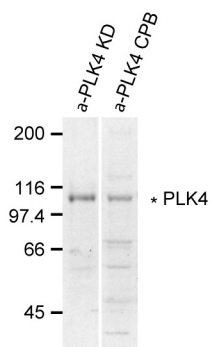

B

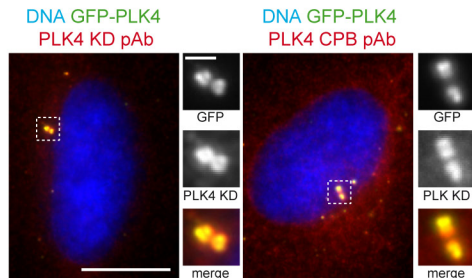

C

Lamin A/C siRNA

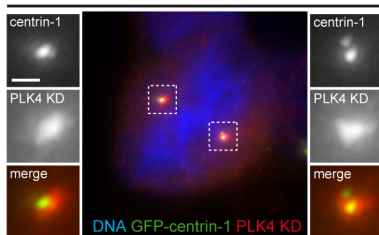

PLK4 siRNA

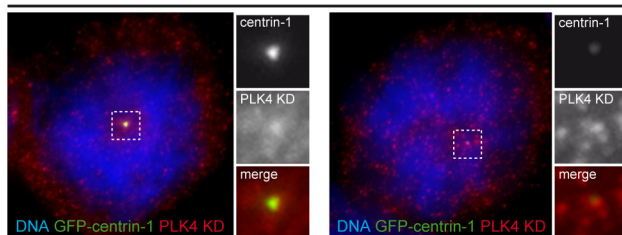

Supplementary Figure S1. Specificity of anti-PLK4 polyclonal antibodies



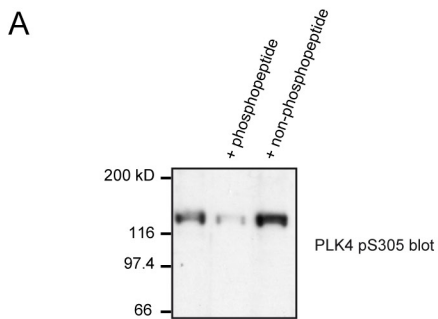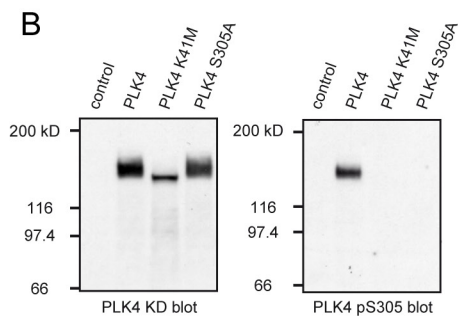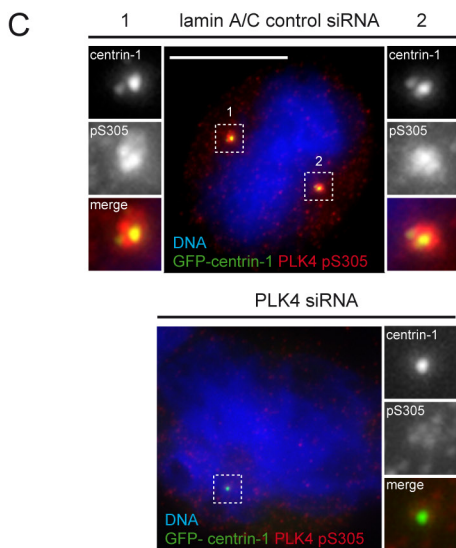

A

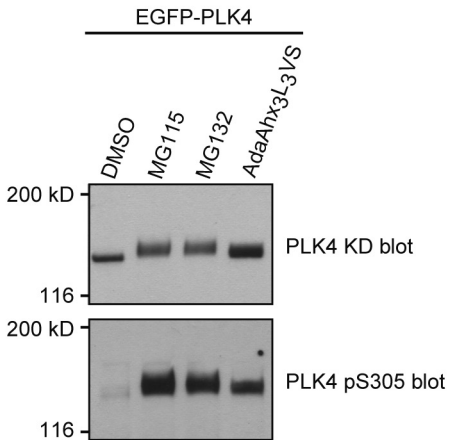

**Supplementary Figure S3. Inhibition of proteasome results in the accumulation of S305 phosphorylated PLK4.**

**A**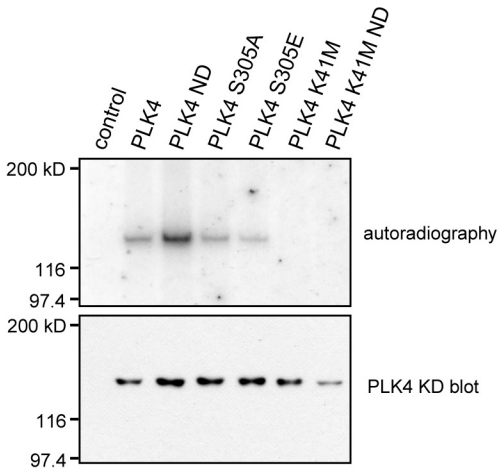

**Supplementary Figure S4. PLK4 S305 mutants are catalytically active**

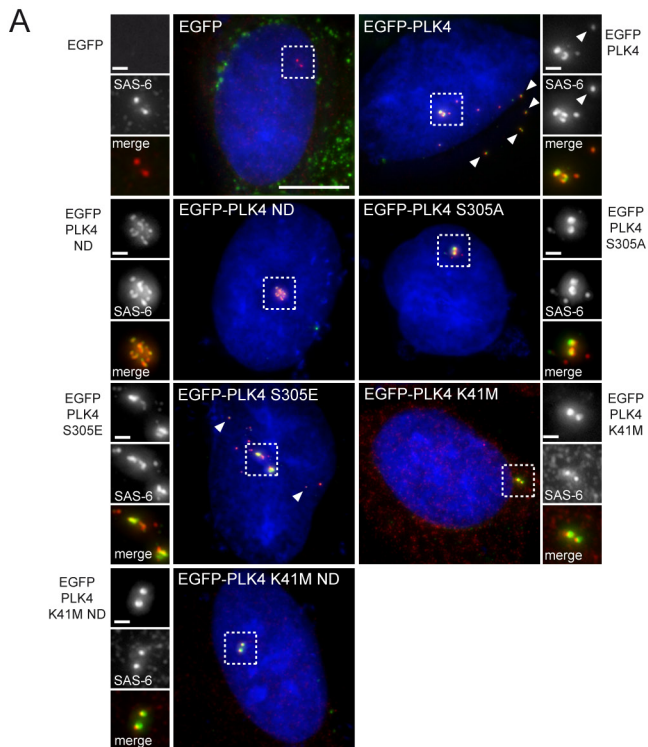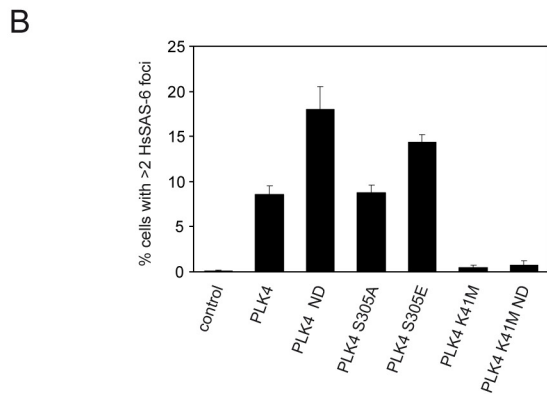

Supplementary Figure S5. PLK4 S305 autophosphorylation enhances centriole amplification in RPE1 cells.
